# Supplementary material for: Convergence in Maximum Stomatal Conductance of C3 Woody Angiosperms in Natural Ecosystems Across Bioclimatic Zones
Source: Front Plant Sci. 2019 May 7;10:558. doi: 10.3389/fpls.2019.00558 (PMC6514322; doi:10.3389/fpls.2019.00558)
Supplement: Supplementary file 2 [file Data_Sheet_1.xlsx]

## Sheet: SppsiteTotal
Species site	Species	Family	Site Code	Site	Bioclimatic zone	Bioclimatic zone abbreviation	Deciduous/evergreen	Tree/shrub	Habitat	Maximum stomatal conductance (porometry) (mmol m-2 s-1)	Maximum stomatal conductance (porometry) calibrated with IRGA (mmol m-2 s-1)
Acacia richii_Sea	Acacia richii	Fabaceae	Sea	Seaqaqa	Tropical forest	TF	Evergreen	Tree	Open-canopy	363.7	234.669
Acer macrophyllum_JasRid	Acer macrophyllum	Sapindaceae	JasRid	Jasper Ridge	Temperate grassland/chapparal	TG-C	Deciduous	Tree	Open-canopy	695.5	468.003
Acer macrophyllum_NewBri	Acer macrophyllum	Sapindaceae	NewBri	New Brighton	Temperate grassland/chapparal	TG-C	Deciduous	Tree	Open-canopy	498	329.114
Acer macrophyllum_PorOrf	Acer macrophyllum	Sapindaceae	PorOrf	Port Orford	Temperate rain forest	TRF	Deciduous	Tree	Open-canopy	478.4	315.331
Acer negundo_JasRid	Acer negundo	Sapindaceae	JasRid	Jasper Ridge	Temperate grassland/chapparal	TG-C	Deciduous	Tree	Open-canopy	587.2	391.842
Acer negundo_Serc	Acer negundo	Sapindaceae	Serc	SERC, Maryland	Temperate deciduous forest	TDF	Deciduous	Tree	Open-canopy	344	220.816
Acer pensylvanicum_Gou	Acer pensylvanicum	Sapindaceae	Gou	Gouldsboro	Temperate deciduous forest	TDF	Deciduous	Tree	Open-canopy	308.1	195.57
Acer rubrum_BigPoc	Acer rubrum	Sapindaceae	BigPoc	Big Pocono	Temperate deciduous forest	TDF	Deciduous	Tree	Open-canopy	312.3	198.5
Acer rubrum_Gou	Acer rubrum	Sapindaceae	Gou	Gouldsboro	Temperate deciduous forest	TDF	Deciduous	Tree	Open-canopy	409.4	266.807
Acer rubrum_Serc	Acer rubrum	Sapindaceae	Serc	SERC, Maryland	Temperate deciduous forest	TDF	Deciduous	Tree	Open-canopy	423.8	276.934
Acer saccharum_BigPoc	Acer saccharum	Sapindaceae	BigPoc	Big Pocono	Temperate deciduous forest	TDF	Deciduous	Tree	Open-canopy	235.5	144.5
Acer saccharum_Gou	Acer saccharum	Sapindaceae	Gou	Gouldsboro	Temperate deciduous forest	TDF	Deciduous	Tree	Open-canopy	296.1	187.131
Acer spicatum_Gou	Acer spicatum	Sapindaceae	Gou	Gouldsboro	Temperate deciduous forest	TDF	Deciduous	Tree	Open-canopy	339.2	217.44
Aesculus californica_JasRid	Aesculus californica	Sapindaceae	JasRid	Jasper Ridge	Temperate grassland/chapparal	TG-C	Deciduous	Tree	Open-canopy	292.1	184.318
Alnus alnobetula_BirCre	Alnus alnobetula	Betulaceae	BirCre	Bird Creek	Boreal forest	BF	Deciduous	Shrub	Open-canopy	361.4	233.1
Alnus alnobetula_CapBla	Alnus alnobetula	Betulaceae	CapBla	Cape Blanco	Temperate rain forest	TRF	Deciduous	Shrub	Open-canopy	433.9	284.037
Alnus alnobetula_CapCoo	Alnus alnobetula	Betulaceae	CapCoo	Captain Cook SRA	Boreal forest	BF	Deciduous	Shrub	Open-canopy	480.9	317.089
Alnus alnobetula_EklLak	Alnus alnobetula	Betulaceae	EklLak	Eklutna Lake	Boreal forest	BF	Deciduous	Shrub	Open-canopy	467.1	307.384
Alnus incana_CapCoo	Alnus incana	Betulaceae	CapCoo	Captain Cook SRA	Boreal forest	BF	Deciduous	Tree	Open-canopy	596.7	398.523
Alnus incana_EklLak	Alnus incana	Betulaceae	EklLak	Eklutna Lake	Boreal forest	BF	Deciduous	Tree	Open-canopy	402.7	262.096
Alnus rubra_Ban	Alnus rubra	Betulaceae	Ban	Bandon	Temperate rain forest	TRF	Deciduous	Tree	Open-canopy	359.3	231.6
Alnus rubra_CapBla	Alnus rubra	Betulaceae	CapBla	Cape Blanco	Temperate rain forest	TRF	Deciduous	Tree	Open-canopy	509.9	337.482
Alnus rubra_HalMoo	Alnus rubra	Betulaceae	HalMoo	Half Moon Bay	Temperate grassland/chapparal	TG-C	Deciduous	Tree	Open-canopy	489.9	323.418
Alstonia costata_Sea	Alstonia costata	Apocynaceae	Sea	Seaqaqa	Tropical forest	TF	Evergreen	Tree	Open-canopy	526.1	348.875
Ambrosia ambrosioides_PunCen	Ambrosia ambrosioides	Asteraceae	PunCen	Punkin Center	Subtropical desert	SD	Evergreen	Shrub	Open-canopy	276	172.996
Ambrosia ambrosioides_RooLak	Ambrosia ambrosioides	Asteraceae	RooLak	Roosevelt Lake	Subtropical desert	SD	Evergreen	Shrub	Open-canopy	319	203.235
Ambrosia ambrosioides_SagLak	Ambrosia ambrosioides	Asteraceae	SagLak	Saguaro Lake	Subtropical desert	SD	Evergreen	Shrub	Open-canopy	631.2	422.785
Amelanchier alnifolia_BirCre	Amelanchier alnifolia	Rosaceae	BirCre	Bird Creek	Boreal forest	BF	Deciduous	Tree	Open-canopy	390.6	253.6
Amelanchier alnifolia_EklLak	Amelanchier alnifolia	Rosaceae	EklLak	Eklutna Lake	Boreal forest	BF	Deciduous	Tree	Open-canopy	469.3	308.931
Arbutus menziesii_Ban	Arbutus menziesii	Ericaceae	Ban	Bandon	Temperate rain forest	TRF	Evergreen	Tree	Open-canopy	523.5	347
Arbutus menziesii_JasRid	Arbutus menziesii	Ericaceae	JasRid	Jasper Ridge	Temperate grassland/chapparal	TG-C	Evergreen	Tree	Open-canopy	571.2	380.591
Arbutus menziesii_NewBri	Arbutus menziesii	Ericaceae	NewBri	New Brighton	Temperate grassland/chapparal	TG-C	Evergreen	Tree	Open-canopy	399.5	259.845
Arctostaphylos columbiana_Ban	Arctostaphylos columbiana	Ericaceae	Ban	Bandon	Temperate rain forest	TRF	Evergreen	Shrub	Open-canopy	306.8	194.7
Astronidium confertiflorum_Sea	Astronidium confertiflorum	Melastomataceae	Sea	Seaqaqa	Tropical forest	TF	Evergreen	Tree	Open-canopy	472.7	311.322
Baccharis pilularis_Ban	Baccharis pilularis	Asteraceae	Ban	Bandon	Temperate rain forest	TRF	Evergreen	Shrub	Open-canopy	317.8	202.4
Baccharis pilularis_CapBla	Baccharis pilularis	Asteraceae	CapBla	Cape Blanco	Temperate rain forest	TRF	Evergreen	Shrub	Open-canopy	406.5	264.768
Baccharis pilularis_HalMoo	Baccharis pilularis	Asteraceae	HalMoo	Half Moon Bay	Temperate grassland/chapparal	TG-C	Evergreen	Shrub	Open-canopy	345.7	222.011
Baccharis pilularis_JasRid	Baccharis pilularis	Asteraceae	JasRid	Jasper Ridge	Temperate grassland/chapparal	TG-C	Evergreen	Shrub	Open-canopy	241.9	149.015
Baccharis pilularis_NewBri	Baccharis pilularis	Asteraceae	NewBri	New Brighton	Temperate grassland/chapparal	TG-C	Evergreen	Shrub	Open-canopy	385.5	250
Baccharis pilularis_PorOrf	Baccharis pilularis	Asteraceae	PorOrf	Port Orford	Temperate rain forest	TRF	Evergreen	Shrub	Open-canopy	306.5	194.444
Baccharis salicifolia_PunCen	Baccharis salicifolia	Asteraceae	PunCen	Punkin Center	Subtropical desert	SD	Evergreen	Shrub	Open-canopy	462.6	304.219
Berberis aquifolium_CapBla	Berberis aquifolium	Berberidaceae	CapBla	Cape Blanco	Temperate rain forest	TRF	Evergreen	Shrub	Open-canopy	286.1	180.098
Berberis aquifolium_PorOrf	Berberis aquifolium	Berberidaceae	PorOrf	Port Orford	Temperate rain forest	TRF	Evergreen	Shrub	Open-canopy	400.3	260.408
Betula alleghaniensis_BigPoc	Betula alleghaniensis	Betulaceae	BigPoc	Big Pocono	Temperate deciduous forest	TDF	Deciduous	Tree	Open-canopy	434	284.1
Betula alleghaniensis_Gou	Betula alleghaniensis	Betulaceae	Gou	Gouldsboro	Temperate deciduous forest	TDF	Deciduous	Tree	Open-canopy	351.2	225.879
Betula kenaica_EklLak	Betula kenaica	Betulaceae	EklLak	Eklutna Lake	Boreal forest	BF	Deciduous	Tree	Open-canopy	344.3	221.027
Betula nana_CapCoo	Betula nana	Betulaceae	CapCoo	Captain Cook SRA	Boreal forest	BF	Deciduous	Shrub	Open-canopy	615.7	411.885
Betula neoalaskana_BirCre	Betula neoalaskana	Betulaceae	BirCre	Bird Creek	Boreal forest	BF	Deciduous	Tree	Open-canopy	369	238.4
Betula neoalaskana_CapCoo	Betula neoalaskana	Betulaceae	CapCoo	Captain Cook SRA	Boreal forest	BF	Deciduous	Tree	Open-canopy	553.5	368.143
Betula neoalaskana_EklLak	Betula neoalaskana	Betulaceae	EklLak	Eklutna Lake	Boreal forest	BF	Deciduous	Tree	Open-canopy	393.6	255.696
Betula populifolia_BigPoc	Betula populifolia	Betulaceae	BigPoc	Big Pocono	Temperate deciduous forest	TDF	Deciduous	Tree	Open-canopy	463.5	304.9
Betula populifolia_Gou	Betula populifolia	Betulaceae	Gou	Gouldsboro	Temperate deciduous forest	TDF	Deciduous	Tree	Open-canopy	354.7	228.34
Calophyllum brasiliense_Gua	Calophyllum brasiliense	Calophyllaceae	Gua	Guajataca	Tropical seasonal forest (moist)	TSF_M	Evergreen	Tree	Open-canopy	378	244.726
Canarium harveyi_Nat	Canarium harveyi	Burseraceae	Nat	Natua	Tropical forest	TF	Evergreen	Tree	Open-canopy	569.7	379.536
Carpinus caroliniana_BatCre	Carpinus caroliniana	Betulaceae	BatCre	Battle Creek	Temperate deciduous forest	TDF	Deciduous	Tree	Open-canopy	237.7	146.1
Casearia decandra_Gua	Casearia decandra	Salicaceae	Gua	Guajataca	Tropical seasonal forest (moist)	TSF_M	Deciduous	Tree	Open-canopy	408.2	265.963
Casearia sylvestris_Gua	Casearia sylvestris	Salicaceae	Gua	Guajataca	Tropical seasonal forest (moist)	TSF_M	Evergreen	Tree	Open-canopy	557.7	371.097
Ceanothus cuneatus_JasRid	Ceanothus cuneatus	Rhamnaceae	JasRid	Jasper Ridge	Temperate grassland/chapparal	TG-C	Evergreen	Shrub	Open-canopy	600.9	401.477
Ceanothus oliganthus_JasRid	Ceanothus oliganthus	Rhamnaceae	JasRid	Jasper Ridge	Temperate grassland/chapparal	TG-C	Evergreen	Shrub	Open-canopy	339.5	217.651
Ceanothus oliganthus_NewBri	Ceanothus oliganthus	Rhamnaceae	NewBri	New Brighton	Temperate grassland/chapparal	TG-C	Evergreen	Shrub	Open-canopy	402.1	261.674
Ceanothus thyrsiflorus_HalMoo	Ceanothus thyrsiflorus	Rhamnaceae	HalMoo	Half Moon Bay	Temperate grassland/chapparal	TG-C	Evergreen	Shrub	Open-canopy	485.6	320.394
Celtis laevigata_PunCen	Celtis laevigata	Cannabaceae	PunCen	Punkin Center	Subtropical desert	SD	Deciduous	Tree	Open-canopy	440.2	288.467
Celtis laevigata_RooLak	Celtis laevigata	Cannabaceae	RooLak	Roosevelt Lake	Subtropical desert	SD	Deciduous	Tree	Open-canopy	253	156.821
Celtis pallida_RooLak	Celtis pallida	Cannabaceae	RooLak	Roosevelt Lake	Subtropical desert	SD	Deciduous	Tree	Open-canopy	234.1	143.53
Celtis pallida_SagLak	Celtis pallida	Cannabaceae	SagLak	Saguaro Lake	Subtropical desert	SD	Deciduous	Tree	Open-canopy	212.4	128.27
Cercidium floridum_PunCen	Cercidium floridum	Fabaceae	PunCen	Punkin Center	Subtropical desert	SD	Deciduous	Tree	Open-canopy	45.7	11.0408
Chilopsis linearis_PunCen	Chilopsis linearis	Bignoniaceae	PunCen	Punkin Center	Subtropical desert	SD	Deciduous	Tree	Open-canopy	130.3	70.5345
Chilopsis linearis_RooLak	Chilopsis linearis	Bignoniaceae	RooLak	Roosevelt Lake	Subtropical desert	SD	Deciduous	Tree	Open-canopy	263.2	163.994
Comptonia peregrina_BigPoc	Comptonia peregrina	Myricaceae	BigPoc	Big Pocono	Temperate deciduous forest	TDF	Deciduous	Shrub	Open-canopy	647.7	434.4
Cornus sericea_NewBri	Cornus sericea	Cornaceae	NewBri	New Brighton	Temperate grassland/chapparal	TG-C	Deciduous	Shrub	Open-canopy	438.2	287.06
Cornus sp1_BigPoc	Cornus sp1	Cornaceae	BigPoc	Big Pocono	Temperate deciduous forest	TDF	Deciduous	Shrub	Open-canopy	526	348.8
Corylus cornuta_PorOrf	Corylus cornuta	Betulaceae	PorOrf	Port Orford	Temperate rain forest	TRF	Deciduous	Shrub	Open-canopy	514.2	340.506
Cotoneaster coriaceus_NewBri	Cotoneaster coriaceus	Rosaceae	NewBri	New Brighton	Temperate grassland/chapparal	TG-C	Evergreen	Shrub	Open-canopy	339.3	217.511
Dillenia biflora_Nat	Dillenia biflora	Dilleniaceae	Nat	Natua	Tropical forest	TF	Evergreen	Tree	Open-canopy	496.6	328.129
Diospyros virginiana_BatCre	Diospyros virginiana	Ebenaceae	BatCre	Battle Creek	Temperate deciduous forest	TDF	Deciduous	Tree	Open-canopy	176.3	102.9
Diospyros virginiana_Serc	Diospyros virginiana	Ebenaceae	Serc	SERC, Maryland	Temperate deciduous forest	TDF	Deciduous	Tree	Open-canopy	382.1	247.609
Dodonaea viscosa_RooLak	Dodonaea viscosa	Sapindaceae	RooLak	Roosevelt Lake	Subtropical desert	SD	Evergreen	Shrub	Open-canopy	275.1	172.363
Dysoxylum mollissimum_Sea	Dysoxylum mollissimum	Meliaceae	Sea	Seaqaqa	Tropical forest	TF	Evergreen	Tree	Open-canopy	692.2	465.682
Elattostachys falcata_Nat	Elattostachys falcata	Sapindaceae	Nat	Natua	Tropical forest	TF	Evergreen	Tree	Open-canopy	450.8	295.921
Elattostachys falcata_Sea	Elattostachys falcata	Sapindaceae	Sea	Seaqaqa	Tropical forest	TF	Evergreen	Tree	Open-canopy	439	287.623
Encelia farinosa_PunCen	Encelia farinosa	Asteraceae	PunCen	Punkin Center	Subtropical desert	SD	Evergreen	Shrub	Open-canopy	67.4	26.301
Encelia farinosa_RooLak	Encelia farinosa	Asteraceae	RooLak	Roosevelt Lake	Subtropical desert	SD	Evergreen	Shrub	Open-canopy	525.6	348.523
Encelia farinosa_SagLak	Encelia farinosa	Asteraceae	SagLak	Saguaro Lake	Subtropical desert	SD	Evergreen	Shrub	Open-canopy	419.2	273.699
Eriodictyon californicum_JasRid	Eriodictyon californicum	Boraginaceae	JasRid	Jasper Ridge	Temperate grassland/chapparal	TG-C	Evergreen	Shrub	Open-canopy	548	364.276
Eriogonum latifolium_HalMoo	Eriogonum latifolium	Polygonaceae	HalMoo	Half Moon Bay	Temperate grassland/chapparal	TG-C	Evergreen	Shrub	Open-canopy	627.5	420.183
Eriophyllum stoechadifolium_HalMoo	Eriophyllum stoechadifolium	Asteraceae	HalMoo	Half Moon Bay	Temperate grassland/chapparal	TG-C	Evergreen	Shrub	Open-canopy	422.6	276.09
Fagus grandifolia_BatCre	Fagus grandifolia	Fagaceae	BatCre	Battle Creek	Temperate deciduous forest	TDF	Deciduous	Tree	Open-canopy	282.5	177.6
Fagus grandifolia_Gou	Fagus grandifolia	Fagaceae	Gou	Gouldsboro	Temperate deciduous forest	TDF	Deciduous	Tree	Open-canopy	313.8	199.578
Fagus grandifolia_Serc	Fagus grandifolia	Fagaceae	Serc	SERC, Maryland	Temperate deciduous forest	TDF	Deciduous	Tree	Open-canopy	232.5	142.405
Ficus fulvopilosa_Sea	Ficus fulvopilosa	Moraceae	Sea	Seaqaqa	Tropical forest	TF	Evergreen	Shrub	Open-canopy	457.3	300.492
Ficus vitiensis_Sea	Ficus vitiensis	Moraceae	Sea	Seaqaqa	Tropical forest	TF	Evergreen	Shrub	Open-canopy	680.6	457.525
Fouquieria splendens_SagLak	Fouquieria splendens	Fouquieriaceae	SagLak	Saguaro Lake	Subtropical desert	SD	Deciduous	Shrub	Open-canopy	310.5	197.257
Frangula californica_HalMoo	Frangula californica	Rhamnaceae	HalMoo	Half Moon Bay	Temperate grassland/chapparal	TG-C	Evergreen	Tree	Open-canopy	467.4	307.595
Frangula californica_JasRid	Frangula californica	Rhamnaceae	JasRid	Jasper Ridge	Temperate grassland/chapparal	TG-C	Evergreen	Tree	Open-canopy	754.6	509.564
Frangula californica_NewBri	Frangula californica	Rhamnaceae	NewBri	New Brighton	Temperate grassland/chapparal	TG-C	Evergreen	Tree	Open-canopy	480.4	316.737
Frangula purshiana_Ban	Frangula purshiana	Rhamnaceae	Ban	Bandon	Temperate rain forest	TRF	Deciduous	Tree	Open-canopy	471.7	310.6
Frangula purshiana_CapBla	Frangula purshiana	Rhamnaceae	CapBla	Cape Blanco	Temperate rain forest	TRF	Deciduous	Tree	Open-canopy	469.1	308.79
Frangula purshiana_PorOrf	Frangula purshiana	Rhamnaceae	PorOrf	Port Orford	Temperate rain forest	TRF	Evergreen	Tree	Open-canopy	432.3	282.911
Fraxinus pennsylvanica_BatCre	Fraxinus pennsylvanica	Oleaceae	BatCre	Battle Creek	Temperate deciduous forest	TDF	Deciduous	Tree	Open-canopy	293.1	185
Fraxinus pennsylvanica_Serc	Fraxinus pennsylvanica	Oleaceae	Serc	SERC, Maryland	Temperate deciduous forest	TDF	Deciduous	Tree	Open-canopy	590.5	394.163
Fraxinus velutina_PunCen	Fraxinus velutina	Oleaceae	PunCen	Punkin Center	Subtropical desert	SD	Deciduous	Tree	Open-canopy	282.4	177.496
Gardenia vitiensis_Sea	Gardenia vitiensis	Rubiaceae	Sea	Seaqaqa	Tropical forest	TF	Evergreen	Shrub	Open-canopy	430	281.294
Garrya elliptica_Ban	Garrya elliptica	Garryaceae	Ban	Bandon	Temperate rain forest	TRF	Evergreen	Tree	Open-canopy	525.5	348.5
Garrya elliptica_CapBla	Garrya elliptica	Garryaceae	CapBla	Cape Blanco	Temperate rain forest	TRF	Evergreen	Tree	Open-canopy	522.1	346.062
Garrya elliptica_PorOrf	Garrya elliptica	Garryaceae	PorOrf	Port Orford	Temperate rain forest	TRF	Evergreen	Tree	Open-canopy	391.3	254.079
Gaultheria shallon_Ban	Gaultheria shallon	Ericaceae	Ban	Bandon	Temperate rain forest	TRF	Evergreen	Shrub	Open-canopy	82.6	37
Gaultheria shallon_CapBla	Gaultheria shallon	Ericaceae	CapBla	Cape Blanco	Temperate rain forest	TRF	Evergreen	Shrub	Open-canopy	401.6	261.322
Gaultheria shallon_PorOrf	Gaultheria shallon	Ericaceae	PorOrf	Port Orford	Temperate rain forest	TRF	Evergreen	Shrub	Open-canopy	304.8	193.249
Hamamelis virginiana_BigPoc	Hamamelis virginiana	Hamamelidaceae	BigPoc	Big Pocono	Temperate deciduous forest	TDF	Deciduous	Shrub	Open-canopy	432.2	282.8
Heteromeles arbutifolia_JasRid	Heteromeles arbutifolia	Rosaceae	JasRid	Jasper Ridge	Temperate grassland/chapparal	TG-C	Evergreen	Shrub	Open-canopy	495	327.004
Heteromeles arbutifolia_NewBri	Heteromeles arbutifolia	Rosaceae	NewBri	New Brighton	Temperate grassland/chapparal	TG-C	Evergreen	Shrub	Open-canopy	569.1	379.114
Holodiscus discolor_JasRid	Holodiscus discolor	Rosaceae	JasRid	Jasper Ridge	Temperate grassland/chapparal	TG-C	Deciduous	Shrub	Open-canopy	355.7	229.044
Ilex opaca_Serc	Ilex opaca	Aquifoliaceae	Serc	SERC, Maryland	Temperate deciduous forest	TDF	Evergreen	Tree	Open-canopy	421.7	275.457
Lepechinia calycina_JasRid	Lepechinia calycina	Lamiaceae	JasRid	Jasper Ridge	Temperate grassland/chapparal	TG-C	Evergreen	Shrub	Open-canopy	210.3	126.793
Liquidambar styraciflua_BatCre	Liquidambar styraciflua	Altingiaceae	BatCre	Battle Creek	Temperate deciduous forest	TDF	Deciduous	Tree	Open-canopy	372.4	240.8
Liquidambar styraciflua_Serc	Liquidambar styraciflua	Altingiaceae	Serc	SERC, Maryland	Temperate deciduous forest	TDF	Deciduous	Tree	Open-canopy	562.7	374.613
Liriodendron tulipifera_BatCre	Liriodendron tulipifera	Magnoliaceae	BatCre	Battle Creek	Temperate deciduous forest	TDF	Deciduous	Tree	Open-canopy	467.1	307.4
Liriodendron tulipifera_Serc	Liriodendron tulipifera	Magnoliaceae	Serc	SERC, Maryland	Temperate deciduous forest	TDF	Deciduous	Tree	Open-canopy	492.8	325.457
Lonicera involucrata_Ban	Lonicera involucrata	Caprifoliaceae	Ban	Bandon	Temperate rain forest	TRF	Deciduous	Shrub	Open-canopy	325.8	208
Lonicera involucrata_CapBla	Lonicera involucrata	Caprifoliaceae	CapBla	Cape Blanco	Temperate rain forest	TRF	Deciduous	Shrub	Open-canopy	397	258.087
Lonicera involucrata_HalMoo	Lonicera involucrata	Caprifoliaceae	HalMoo	Half Moon Bay	Temperate grassland/chapparal	TG-C	Deciduous	Shrub	Open-canopy	419.6	273.98
Lonicera involucrata_PorOrf	Lonicera involucrata	Caprifoliaceae	PorOrf	Port Orford	Temperate rain forest	TRF	Deciduous	Shrub	Open-canopy	374.3	242.124
Lupinus arboreus_HalMoo	Lupinus arboreus	Fabaceae	HalMoo	Half Moon Bay	Temperate grassland/chapparal	TG-C	Evergreen	Shrub	Open-canopy	320.1	204.008
Malus fusca_PorOrf	Malus fusca	Rosaceae	PorOrf	Port Orford	Temperate rain forest	TRF	Deciduous	Tree	Open-canopy	478.2	315.19
Myrica californica_CapBla	Myrica californica	Myricaceae	CapBla	Cape Blanco	Temperate rain forest	TRF	Deciduous	Tree	Open-canopy	347.3	223.136
Myrica californica_PorOrf	Myrica californica	Myricaceae	PorOrf	Port Orford	Temperate rain forest	TRF	Evergreen	Tree	Open-canopy	374.4	242.194
Myristica castaneifolia_Sea	Myristica castaneifolia	Myristicaceae	Sea	Seaqaqa	Tropical forest	TF	Evergreen	Tree	Open-canopy	505.4	334.318
Neea buxifolia_Gua	Neea buxifolia	Nyctaginaceae	Gua	Guajataca	Tropical seasonal forest (moist)	TSF_M	Evergreen	Shrub	Open-canopy	189.4	112.096
Nyssa sylvatica_Serc	Nyssa sylvatica	Cornaceae	Serc	SERC, Maryland	Temperate deciduous forest	TDF	Deciduous	Tree	Open-canopy	410.2	267.37
Oemleria cerasiformis_PorOrf	Oemleria cerasiformis	Rosaceae	PorOrf	Port Orford	Temperate rain forest	TRF	Deciduous	Tree	Open-canopy	177.9	104.008
Populus balsamifera_BirCre	Populus balsamifera	Salicaceae	BirCre	Bird Creek	Boreal forest	BF	Deciduous	Tree	Open-canopy	485.6	320.4
Populus balsamifera_EklLak	Populus balsamifera	Salicaceae	EklLak	Eklutna Lake	Boreal forest	BF	Deciduous	Tree	Open-canopy	491	324.191
Populus fremontii_PunCen	Populus fremontii	Salicaceae	PunCen	Punkin Center	Subtropical desert	SD	Deciduous	Tree	Open-canopy	222.5	135.373
Populus fremontii_RooLak	Populus fremontii	Salicaceae	RooLak	Roosevelt Lake	Subtropical desert	SD	Deciduous	Tree	Open-canopy	117.8	61.744
Populus fremontii_SagLak	Populus fremontii	Salicaceae	SagLak	Saguaro Lake	Subtropical desert	SD	Deciduous	Tree	Open-canopy	393.5	255.626
Populus tremuloides_BirCre	Populus tremuloides	Salicaceae	BirCre	Bird Creek	Boreal forest	BF	Deciduous	Tree	Open-canopy	543.5	361.1
Populus tremuloides_EklLak	Populus tremuloides	Salicaceae	EklLak	Eklutna Lake	Boreal forest	BF	Deciduous	Tree	Open-canopy	584.7	390.084
Populus tremuloides_Gou	Populus tremuloides	Salicaceae	Gou	Gouldsboro	Temperate deciduous forest	TDF	Deciduous	Tree	Open-canopy	421.6	275.387
Populus tremuloides_NewBri	Populus tremuloides	Salicaceae	NewBri	New Brighton	Temperate grassland/chapparal	TG-C	Deciduous	Tree	Open-canopy	236	144.866
Prosopis velutina_PunCen	Prosopis velutina	Fabaceae	PunCen	Punkin Center	Subtropical desert	SD	Deciduous	Tree	Open-canopy	188.6	111.533
Prosopis velutina_RooLak	Prosopis velutina	Fabaceae	RooLak	Roosevelt Lake	Subtropical desert	SD	Deciduous	Tree	Open-canopy	170.1	98.5232
Prosopis velutina_SagLak	Prosopis velutina	Fabaceae	SagLak	Saguaro Lake	Subtropical desert	SD	Deciduous	Tree	Open-canopy	420.1	274.332
Prunus emarginata_NewBri	Prunus emarginata	Rosaceae	NewBri	New Brighton	Temperate grassland/chapparal	TG-C	Deciduous	Tree	Open-canopy	396.8	257.947
Prunus ilicifolia_JasRid	Prunus ilicifolia	Rosaceae	JasRid	Jasper Ridge	Temperate grassland/chapparal	TG-C	Evergreen	Shrub	Open-canopy	579.5	386.428
Prunus pensylvanica_Gou	Prunus pensylvanica	Rosaceae	Gou	Gouldsboro	Temperate deciduous forest	TDF	Deciduous	Tree	Open-canopy	231.2	141.491
Prunus serotina_BatCre	Prunus serotina	Rosaceae	BatCre	Battle Creek	Temperate deciduous forest	TDF	Deciduous	Tree	Open-canopy	359.2	231.5
Prunus serotina_BigPoc	Prunus serotina	Rosaceae	BigPoc	Big Pocono	Temperate deciduous forest	TDF	Deciduous	Tree	Open-canopy	437	286.2
Prunus serotina_Serc	Prunus serotina	Rosaceae	Serc	SERC, Maryland	Temperate deciduous forest	TDF	Deciduous	Tree	Open-canopy	580.8	387.342
Psidium amplexicaule_Gua	Psidium amplexicaule	Myrtaceae	Gua	Guajataca	Tropical seasonal forest (moist)	TSF_M	Evergreen	Shrub	Open-canopy	349.1	224.402
Quercus agrifolia_JasRid	Quercus agrifolia	Fagaceae	JasRid	Jasper Ridge	Temperate grassland/chapparal	TG-C	Evergreen	Tree	Open-canopy	458.8	301.547
Quercus agrifolia_NewBri	Quercus agrifolia	Fagaceae	NewBri	New Brighton	Temperate grassland/chapparal	TG-C	Evergreen	Tree	Open-canopy	320.4	204.219
Quercus falcata_BatCre	Quercus falcata	Fagaceae	BatCre	Battle Creek	Temperate deciduous forest	TDF	Deciduous	Tree	Open-canopy	466.6	307
Quercus lobata_JasRid	Quercus lobata	Fagaceae	JasRid	Jasper Ridge	Temperate grassland/chapparal	TG-C	Deciduous	Tree	Open-canopy	680.6	457.525
Quercus michauxii_Serc	Quercus michauxii	Fagaceae	Serc	SERC, Maryland	Temperate deciduous forest	TDF	Deciduous	Tree	Open-canopy	438.6	287.342
Quercus palustris_Serc	Quercus palustris	Fagaceae	Serc	SERC, Maryland	Temperate deciduous forest	TDF	Deciduous	Tree	Open-canopy	266.3	166.174
Quercus turbinella_PunCen	Quercus turbinella	Fagaceae	PunCen	Punkin Center	Subtropical desert	SD	Evergreen	Tree	Open-canopy	227.3	138.748
Quercus turbinella_RooLak	Quercus turbinella	Fagaceae	RooLak	Roosevelt Lake	Subtropical desert	SD	Evergreen	Tree	Open-canopy	232.3	142.264
Rhamnus crocea_JasRid	Rhamnus crocea	Rhamnaceae	JasRid	Jasper Ridge	Temperate grassland/chapparal	TG-C	Evergreen	Shrub	Open-canopy	343.8	220.675
Rhododendron macrophyllum_PorOrf	Rhododendron macrophyllum	Ericaceae	PorOrf	Port Orford	Temperate rain forest	TRF	Evergreen	Tree	Open-canopy	249.2	154.149
Rhododendron occidentale_PorOrf	Rhododendron occidentale	Ericaceae	PorOrf	Port Orford	Temperate rain forest	TRF	Evergreen	Shrub	Open-canopy	423.6	276.793
Rhus copallinum_BatCre	Rhus copallinum	Anacardiaceae	BatCre	Battle Creek	Temperate deciduous forest	TDF	Deciduous	Shrub	Open-canopy	611.1	408.6
Rosa acicularis_CapCoo	Rosa acicularis	Rosaceae	CapCoo	Captain Cook SRA	Boreal forest	BF	Deciduous	Shrub	Open-canopy	406.1	264.487
Rubus idaeus_CapCoo	Rubus idaeus	Rosaceae	CapCoo	Captain Cook SRA	Boreal forest	BF	Deciduous	Shrub	Open-canopy	445.6	292.264
Rubus parviflorus_CapBla	Rubus parviflorus	Rosaceae	CapBla	Cape Blanco	Temperate rain forest	TRF	Deciduous	Shrub	Open-canopy	575.6	383.685
Rubus parviflorus_PorOrf	Rubus parviflorus	Rosaceae	PorOrf	Port Orford	Temperate rain forest	TRF	Deciduous	Shrub	Open-canopy	528.8	350.774
Rubus praecox_CapBla	Rubus praecox	Rosaceae	CapBla	Cape Blanco	Temperate rain forest	TRF	Deciduous	Shrub	Open-canopy	589.7	393.601
Rubus spectabilis_CapBla	Rubus spectabilis	Rosaceae	CapBla	Cape Blanco	Temperate rain forest	TRF	Deciduous	Shrub	Open-canopy	408.5	266.174
Rubus ursinus_CapBla	Rubus ursinus	Rosaceae	CapBla	Cape Blanco	Temperate rain forest	TRF	Deciduous	Shrub	Open-canopy	394.2	256.118
Rubus ursinus_HalMoo	Rubus ursinus	Rosaceae	HalMoo	Half Moon Bay	Temperate grassland/chapparal	TG-C	Deciduous	Shrub	Open-canopy	453.7	297.961
Salix alaxensis_CapCoo	Salix alaxensis	Salicaceae	CapCoo	Captain Cook SRA	Boreal forest	BF	Deciduous	Tree	Open-canopy	682.4	458.79
Salix alaxensis_EklLak	Salix alaxensis	Salicaceae	EklLak	Eklutna Lake	Boreal forest	BF	Deciduous	Tree	Open-canopy	663.2	445.288
Salix barclayi_EklLak	Salix barclayi	Salicaceae	EklLak	Eklutna Lake	Boreal forest	BF	Deciduous	Shrub	Open-canopy	634.4	425.035
Salix exigua_PunCen	Salix exigua	Salicaceae	PunCen	Punkin Center	Subtropical desert	SD	Deciduous	Shrub	Open-canopy	453	297.468
Salix gooddingii_PunCen	Salix gooddingii	Salicaceae	PunCen	Punkin Center	Subtropical desert	SD	Deciduous	Tree	Open-canopy	426.1	278.551
Salix gooddingii_RooLak	Salix gooddingii	Salicaceae	RooLak	Roosevelt Lake	Subtropical desert	SD	Deciduous	Tree	Open-canopy	331.6	212.096
Salix gooddingii_SagLak	Salix gooddingii	Salicaceae	SagLak	Saguaro Lake	Subtropical desert	SD	Deciduous	Tree	Open-canopy	509.2	336.99
Salix hookeriana_Ban	Salix hookeriana	Salicaceae	Ban	Bandon	Temperate rain forest	TRF	Deciduous	Tree	Open-canopy	612.3	409.5
Salix hookeriana_CapBla	Salix hookeriana	Salicaceae	CapBla	Cape Blanco	Temperate rain forest	TRF	Deciduous	Tree	Open-canopy	605.7	404.852
Salix hookeriana_PorOrf	Salix hookeriana	Salicaceae	PorOrf	Port Orford	Temperate rain forest	TRF	Deciduous	Tree	Open-canopy	521.7	345.781
Salix lasiandra_HalMoo	Salix lasiandra	Salicaceae	HalMoo	Half Moon Bay	Temperate grassland/chapparal	TG-C	Deciduous	Tree	Open-canopy	524.5	347.75
Salix lasiandra_NewBri	Salix lasiandra	Salicaceae	NewBri	New Brighton	Temperate grassland/chapparal	TG-C	Deciduous	Tree	Open-canopy	348	223.629
Salix lasiandra_PorOrf	Salix lasiandra	Salicaceae	PorOrf	Port Orford	Temperate rain forest	TRF	Deciduous	Tree	Open-canopy	563.1	374.895
Salix lasiolepis_HalMoo	Salix lasiolepis	Salicaceae	HalMoo	Half Moon Bay	Temperate grassland/chapparal	TG-C	Deciduous	Tree	Open-canopy	586.4	391.28
Salix lasiolepis_JasRid	Salix lasiolepis	Salicaceae	JasRid	Jasper Ridge	Temperate grassland/chapparal	TG-C	Deciduous	Tree	Open-canopy	479.4	316.034
Salix lasiolepis_NewBri	Salix lasiolepis	Salicaceae	NewBri	New Brighton	Temperate grassland/chapparal	TG-C	Deciduous	Tree	Open-canopy	192.1	113.994
Salix nigra_Gou	Salix nigra	Salicaceae	Gou	Gouldsboro	Temperate deciduous forest	TDF	Deciduous	Tree	Open-canopy	490.9	324.121
Salix scouleriana_Ban	Salix scouleriana	Salicaceae	Ban	Bandon	Temperate rain forest	TRF	Deciduous	Tree	Open-canopy	401.6	261.3
Salix scouleriana_BirCre	Salix scouleriana	Salicaceae	BirCre	Bird Creek	Boreal forest	BF	Deciduous	Tree	Open-canopy	634.7	425.2
Salix scouleriana_CapBla	Salix scouleriana	Salicaceae	CapBla	Cape Blanco	Temperate rain forest	TRF	Deciduous	Tree	Open-canopy	420	274.262
Salix scouleriana_EklLak	Salix scouleriana	Salicaceae	EklLak	Eklutna Lake	Boreal forest	BF	Deciduous	Tree	Open-canopy	487.6	321.8
Salix scouleriana_PorOrf	Salix scouleriana	Salicaceae	PorOrf	Port Orford	Temperate rain forest	TRF	Deciduous	Tree	Open-canopy	522	345.992
Salix sitchensis_CapBla	Salix sitchensis	Salicaceae	CapBla	Cape Blanco	Temperate rain forest	TRF	Deciduous	Tree	Open-canopy	454.7	298.664
Salix sitchensis_HalMoo	Salix sitchensis	Salicaceae	HalMoo	Half Moon Bay	Temperate grassland/chapparal	TG-C	Deciduous	Tree	Open-canopy	514.2	340.506
Sambucus canadensis_BatCre	Sambucus canadensis	Adoxaceae	BatCre	Battle Creek	Temperate deciduous forest	TDF	Deciduous	Tree	Open-canopy	204.2	122.5
Sambucus nigra_JasRid	Sambucus nigra	Adoxaceae	JasRid	Jasper Ridge	Temperate grassland/chapparal	TG-C	Deciduous	Tree	Open-canopy	309.2	196.343
Sambucus nigra_NewBri	Sambucus nigra	Adoxaceae	NewBri	New Brighton	Temperate grassland/chapparal	TG-C	Deciduous	Tree	Open-canopy	451.9	296.695
Sambucus racemosa_Ban	Sambucus racemosa	Adoxaceae	Ban	Bandon	Temperate rain forest	TRF	Deciduous	Tree	Open-canopy	213.4	129
Sambucus racemosa_BirCre	Sambucus racemosa	Adoxaceae	BirCre	Bird Creek	Boreal forest	BF	Deciduous	Tree	Open-canopy	526.2	348.9
Sambucus racemosa_CapBla	Sambucus racemosa	Adoxaceae	CapBla	Cape Blanco	Temperate rain forest	TRF	Deciduous	Tree	Open-canopy	440.9	288.959
Sambucus racemosa_HalMoo	Sambucus racemosa	Adoxaceae	HalMoo	Half Moon Bay	Temperate grassland/chapparal	TG-C	Deciduous	Tree	Open-canopy	454.6	298.594
Sassafras albidum_BigPoc	Sassafras albidum	Lauraceae	BigPoc	Big Pocono	Temperate deciduous forest	TDF	Deciduous	Tree	Open-canopy	288.4	181.7
Senegalia greggii_PunCen	Senegalia greggii	Fabaceae	PunCen	Punkin Center	Subtropical desert	SD	Deciduous	Tree	Open-canopy	175.8	102.532
Senegalia greggii_RooLak	Senegalia greggii	Fabaceae	RooLak	Roosevelt Lake	Subtropical desert	SD	Deciduous	Tree	Open-canopy	135.9	74.4726
Senegalia greggii_SagLak	Senegalia greggii	Fabaceae	SagLak	Saguaro Lake	Subtropical desert	SD	Deciduous	Tree	Open-canopy	162.9	93.4599
Simmondsia chinensis_PunCen	Simmondsia chinensis	Simmondsiaceae	PunCen	Punkin Center	Subtropical desert	SD	Evergreen	Shrub	Open-canopy	78.7	34.2475
Simmondsia chinensis_RooLak	Simmondsia chinensis	Simmondsiaceae	RooLak	Roosevelt Lake	Subtropical desert	SD	Evergreen	Shrub	Open-canopy	130.6	70.7454
Simmondsia chinensis_SagLak	Simmondsia chinensis	Simmondsiaceae	SagLak	Saguaro Lake	Subtropical desert	SD	Evergreen	Shrub	Open-canopy	144.9	80.8017
Tetrazygia eleagnoides_Gua	Tetrazygia eleagnoides	Melastomataceae	Gua	Guajataca	Tropical seasonal forest (moist)	TSF_M	Evergreen	Shrub	Open-canopy	759.2	512.799
Toxicodendron diversilobum_JasRid	Toxicodendron diversilobum	Anacardiaceae	JasRid	Jasper Ridge	Temperate grassland/chapparal	TG-C	Deciduous	Shrub	Open-canopy	502.2	332.068
Toxicodendron diversilobum_NewBri	Toxicodendron diversilobum	Anacardiaceae	NewBri	New Brighton	Temperate grassland/chapparal	TG-C	Deciduous	Shrub	Open-canopy	333.2	213.221
Ulmus americana_BatCre	Ulmus americana	Ulmaceae	BatCre	Battle Creek	Temperate deciduous forest	TDF	Deciduous	Tree	Open-canopy	412.2	268.8
Ulmus americana_BigPoc	Ulmus americana	Ulmaceae	BigPoc	Big Pocono	Temperate deciduous forest	TDF	Deciduous	Tree	Open-canopy	390.2	253.3
Ulmus americana_Serc	Ulmus americana	Ulmaceae	Serc	SERC, Maryland	Temperate deciduous forest	TDF	Deciduous	Tree	Open-canopy	472.9	311.463
Viburnum prunifolium_Serc	Viburnum prunifolium	Adoxaceae	Serc	SERC, Maryland	Temperate deciduous forest	TDF	Deciduous	Tree	Open-canopy	536.1	355.907
Ziziphus obtusifolia_PunCen	Ziziphus obtusifolia	Rhamnaceae	PunCen	Punkin Center	Subtropical desert	SD	Deciduous	Shrub	Open-canopy	215.4	130.38
Ziziphus obtusifolia_RooLak	Ziziphus obtusifolia	Rhamnaceae	RooLak	Roosevelt Lake	Subtropical desert	SD	Deciduous	Shrub	Open-canopy	130.7	70.8158
Ziziphus obtusifolia_SagLak	Ziziphus obtusifolia	Rhamnaceae	SagLak	Saguaro Lake	Subtropical desert	SD	Deciduous	Shrub	Open-canopy	235.5	144.515
Acer rubrum_BatCre	Acer rubrum	Sapindaceae	BatCre	Battle Creek	Temperate deciduous forest	TDF	Deciduous	Tree	Understorey-subcanopy	319.3	203.4
Acer rubrum_Serc	Acer rubrum	Sapindaceae	Serc	SERC, Maryland	Temperate deciduous forest	TDF	Deciduous	Tree	Understorey-subcanopy	437.7	286.709
Aglaia basiphylla_Nat	Aglaia basiphylla	Meliaceae	Nat	Natua	Tropical forest	TF	Evergreen	Tree	Understorey-subcanopy	213.8	129.255
Aglaia basiphylla_Sea	Aglaia basiphylla	Meliaceae	Sea	Seaqaqa	Tropical forest	TF	Evergreen	Tree	Understorey-subcanopy	249.6	154.43
Allophylus crassinervis_Gua	Allophylus crassinervis	Sapindaceae	Gua	Guajataca	Tropical seasonal forest (moist)	TSF_M	Deciduous	Tree	Understorey-subcanopy	444.7	291.632
Alnus rhombifolia_JasRid	Alnus rhombifolia	Betulaceae	JasRid	Jasper Ridge	Temperate grassland/chapparal	TG-C	Deciduous	Tree	Understorey-subcanopy	611	408.579
Alnus rubra_PorOrf	Alnus rubra	Betulaceae	PorOrf	Port Orford	Temperate rain forest	TRF	Deciduous	Tree	Understorey-subcanopy	469.2	308.861
Alnus serrulata_BatCre	Alnus serrulata	Betulaceae	BatCre	Battle Creek	Temperate deciduous forest	TDF	Deciduous	Tree	Understorey-subcanopy	290.1	182.9
Amaroria soulameoides_Nat	Amaroria soulameoides	Simaroubaceae	Nat	Natua	Tropical forest	TF	Evergreen	Tree	Understorey-subcanopy	431.1	282.068
Amaroria soulameoides_Sea	Amaroria soulameoides	Simaroubaceae	Sea	Seaqaqa	Tropical forest	TF	Evergreen	Tree	Understorey-subcanopy	572.2	381.294
Amelanchier alnifolia_BirCre	Amelanchier alnifolia	Rosaceae	BirCre	Bird Creek	Boreal forest	BF	Deciduous	Tree	Understorey-subcanopy	357.6	230.4
Amelanchier alnifolia_EklLak	Amelanchier alnifolia	Rosaceae	EklLak	Eklutna Lake	Boreal forest	BF	Deciduous	Tree	Understorey-subcanopy	348.3	223.84
Amelanchier arborea_Gou	Amelanchier arborea	Rosaceae	Gou	Gouldsboro	Temperate deciduous forest	TDF	Deciduous	Tree	Understorey-subcanopy	333.1	213.15
Arbutus menziesii_JasRid	Arbutus menziesii	Ericaceae	JasRid	Jasper Ridge	Temperate grassland/chapparal	TG-C	Evergreen	Tree	Understorey-subcanopy	304.3	192.897
Arctostaphylos uva-ursi_EklLak	Arctostaphylos uva-ursi	Ericaceae	EklLak	Eklutna Lake	Boreal forest	BF	Evergreen	Shrub	Understorey-subcanopy	138.3	76.1603
Asimina triloba_BatCre	Asimina triloba	Annonaceae	BatCre	Battle Creek	Temperate deciduous forest	TDF	Deciduous	Tree	Understorey-subcanopy	249.5	154.4
Astronidium confertiflorum_Sea	Astronidium confertiflorum	Melastomataceae	Sea	Seaqaqa	Tropical forest	TF	Evergreen	Tree	Understorey-subcanopy	676.8	454.852
Berberis nervosa_Ban	Berberis nervosa	Berberidaceae	Ban	Bandon	Temperate rain forest	TRF	Evergreen	Shrub	Understorey-subcanopy	165.9	95.6
Berberis thunbergii_BigPoc	Berberis thunbergii	Berberidaceae	BigPoc	Big Pocono	Temperate deciduous forest	TDF	Deciduous	Shrub	Understorey-subcanopy	308.7	196
Betula neoalaskana_BirCre	Betula neoalaskana	Betulaceae	BirCre	Bird Creek	Boreal forest	BF	Deciduous	Tree	Understorey-subcanopy	217.1	131.6
Bischofia javanica_Sea	Bischofia javanica	Phyllanthaceae	Sea	Seaqaqa	Tropical forest	TF	Evergreen	Tree	Understorey-subcanopy	229.1	140.014
Buchanania attenuata_Nat	Buchanania attenuata	Anacardiaceae	Nat	Natua	Tropical forest	TF	Evergreen	Tree	Understorey-subcanopy	310.2	197.046
Calophyllum brasiliense_Gua	Calophyllum brasiliense	Calophyllaceae	Gua	Guajataca	Tropical seasonal forest (moist)	TSF_M	Evergreen	Tree	Understorey-subcanopy	272.3	170.394
Calophyllum vitiense_Sea	Calophyllum vitiense	Calophyllaceae	Sea	Seaqaqa	Tropical forest	TF	Evergreen	Tree	Understorey-subcanopy	309.5	196.554
Carpinus caroliniana_BatCre	Carpinus caroliniana	Betulaceae	BatCre	Battle Creek	Temperate deciduous forest	TDF	Deciduous	Tree	Understorey-subcanopy	157.9	89.9
Carpinus caroliniana_Serc	Carpinus caroliniana	Betulaceae	Serc	SERC, Maryland	Temperate deciduous forest	TDF	Deciduous	Tree	Understorey-subcanopy	273.1	170.956
Carya ovata_Serc	Carya ovata	Juglandaceae	Serc	SERC, Maryland	Temperate deciduous forest	TDF	Deciduous	Tree	Understorey-subcanopy	328.4	209.845
Coccoloba diversifolia_Gua	Coccoloba diversifolia	Polygonaceae	Gua	Guajataca	Tropical seasonal forest (moist)	TSF_M	Evergreen	Tree	Understorey-subcanopy	254	157.525
Comocladia glabra_Gua	Comocladia glabra	Anacardiaceae	Gua	Guajataca	Tropical seasonal forest (moist)	TSF_M	Evergreen	Shrub	Understorey-subcanopy	407.3	265.331
Cornus amomum_BatCre	Cornus amomum	Cornaceae	BatCre	Battle Creek	Temperate deciduous forest	TDF	Deciduous	Shrub	Understorey-subcanopy	195	116
Cornus florida_BatCre	Cornus florida	Cornaceae	BatCre	Battle Creek	Temperate deciduous forest	TDF	Deciduous	Tree	Understorey-subcanopy	238.2	146.4
Cornus florida_BigPoc	Cornus florida	Cornaceae	BigPoc	Big Pocono	Temperate deciduous forest	TDF	Deciduous	Tree	Understorey-subcanopy	287.9	181.4
Cornus florida_Serc	Cornus florida	Cornaceae	Serc	SERC, Maryland	Temperate deciduous forest	TDF	Deciduous	Tree	Understorey-subcanopy	268.2	167.511
Cotoneaster coriaceus_NewBri	Cotoneaster coriaceus	Rosaceae	NewBri	New Brighton	Temperate grassland/chapparal	TG-C	Evergreen	Shrub	Understorey-subcanopy	361.3	232.982
Cotoneaster pannosus_JasRid	Cotoneaster pannosus	Rosaceae	JasRid	Jasper Ridge	Temperate grassland/chapparal	TG-C	Evergreen	Shrub	Understorey-subcanopy	174.6	101.688
Crataegus mollis_BigPoc	Crataegus mollis	Rosaceae	BigPoc	Big Pocono	Temperate deciduous forest	TDF	Deciduous	Tree	Understorey-subcanopy	571.3	380.7
Cyrilla racemiflora_BatCre	Cyrilla racemiflora	Cyrillaceae	BatCre	Battle Creek	Temperate deciduous forest	TDF	Deciduous	Shrub	Understorey-subcanopy	337	215.9
Dasiphora fruticosa_EklLak	Dasiphora fruticosa	Rosaceae	EklLak	Eklutna Lake	Boreal forest	BF	Deciduous	Shrub	Understorey-subcanopy	429.9	281.224
Dillenia biflora_Nat	Dillenia biflora	Dilleniaceae	Nat	Natua	Tropical forest	TF	Evergreen	Tree	Understorey-subcanopy	282.5	177.567
Dillenia biflora_Sea	Dillenia biflora	Dilleniaceae	Sea	Seaqaqa	Tropical forest	TF	Evergreen	Tree	Understorey-subcanopy	373.7	241.702
Diospyros virginiana_Serc	Diospyros virginiana	Ebenaceae	Serc	SERC, Maryland	Temperate deciduous forest	TDF	Deciduous	Tree	Understorey-subcanopy	336.2	215.331
Drypetes alba_Gua	Drypetes alba	Putranjivaceae	Gua	Guajataca	Tropical seasonal forest (moist)	TSF_M	Evergreen	Shrub	Understorey-subcanopy	156.6	89.0295
Dysoxylum mollissimum_Sea	Dysoxylum mollissimum	Meliaceae	Sea	Seaqaqa	Tropical forest	TF	Evergreen	Tree	Understorey-subcanopy	520.3	344.796
Elattostachys falcata_Sea	Elattostachys falcata	Sapindaceae	Sea	Seaqaqa	Tropical forest	TF	Evergreen	Tree	Understorey-subcanopy	417.5	272.504
Eugenia axillaris_Gua	Eugenia axillaris	Myrtaceae	Gua	Guajataca	Tropical seasonal forest (moist)	TSF_M	Evergreen	Tree	Understorey-subcanopy	266.3	166.174
Eugenia biflora_Gua	Eugenia biflora	Myrtaceae	Gua	Guajataca	Tropical seasonal forest (moist)	TSF_M	Evergreen	Tree	Understorey-subcanopy	366	236.287
Euonymus americanus_BatCre	Euonymus americanus	Celastraceae	BatCre	Battle Creek	Temperate deciduous forest	TDF	Deciduous	Shrub	Understorey-subcanopy	430	281.3
Fagraea gracilipes_Nat	Fagraea gracilipes	Gentianaceae	Nat	Natua	Tropical forest	TF	Evergreen	Tree	Understorey-subcanopy	354.8	228.411
Fagraea gracilipes_Sea	Fagraea gracilipes	Gentianaceae	Sea	Seaqaqa	Tropical forest	TF	Evergreen	Tree	Understorey-subcanopy	423.1	276.442
Faramea occidentalis_Gua	Faramea occidentalis	Rubiaceae	Gua	Guajataca	Tropical seasonal forest (moist)	TSF_M	Evergreen	Shrub	Understorey-subcanopy	227.3	138.748
Ficus barclayana_Sea	Ficus barclayana	Moraceae	Sea	Seaqaqa	Tropical forest	TF	Evergreen	Shrub	Understorey-subcanopy	376.5	243.671
Ficus fulvopilosa_Nat	Ficus fulvopilosa	Moraceae	Nat	Natua	Tropical forest	TF	Evergreen	Shrub	Understorey-subcanopy	556.7	370.394
Ficus fulvopilosa_Sea	Ficus fulvopilosa	Moraceae	Sea	Seaqaqa	Tropical forest	TF	Evergreen	Shrub	Understorey-subcanopy	715.3	481.927
Flacourtia vitiensis_Nat	Flacourtia vitiensis	Salicaceae	Nat	Natua	Tropical forest	TF	Evergreen	Tree	Understorey-subcanopy	434.7	284.599
Flacourtia vitiensis_Sea	Flacourtia vitiensis	Salicaceae	Sea	Seaqaqa	Tropical forest	TF	Evergreen	Tree	Understorey-subcanopy	214.5	129.747
Fraxinus pennsylvanica_BatCre	Fraxinus pennsylvanica	Oleaceae	BatCre	Battle Creek	Temperate deciduous forest	TDF	Deciduous	Tree	Understorey-subcanopy	166.4	95.9
Fraxinus pennsylvanica_Serc	Fraxinus pennsylvanica	Oleaceae	Serc	SERC, Maryland	Temperate deciduous forest	TDF	Deciduous	Tree	Understorey-subcanopy	239.5	147.328
Gardenia hillii_Nat	Gardenia hillii	Rubiaceae	Nat	Natua	Tropical forest	TF	Evergreen	Shrub	Understorey-subcanopy	477.3	314.557
Gardenia hillii_Sea	Gardenia hillii	Rubiaceae	Sea	Seaqaqa	Tropical forest	TF	Evergreen	Shrub	Understorey-subcanopy	442.5	290.084
Gardenia vitiensis_Sea	Gardenia vitiensis	Rubiaceae	Sea	Seaqaqa	Tropical forest	TF	Evergreen	Shrub	Understorey-subcanopy	360.1	232.138
Garrya elliptica_Ban	Garrya elliptica	Garryaceae	Ban	Bandon	Temperate rain forest	TRF	Evergreen	Tree	Understorey-subcanopy	446.4	292.8
Garrya elliptica_PorOrf	Garrya elliptica	Garryaceae	PorOrf	Port Orford	Temperate rain forest	TRF	Evergreen	Tree	Understorey-subcanopy	339.3	217.511
Gaultheria shallon_Ban	Gaultheria shallon	Ericaceae	Ban	Bandon	Temperate rain forest	TRF	Evergreen	Shrub	Understorey-subcanopy	281.9	177.1
Gaylussacia baccata_Ban	Gaylussacia baccata	Ericaceae	Ban	Bandon	Temperate rain forest	TRF	Deciduous	Shrub	Understorey-subcanopy	214.6	129.8
Gaylussacia baccata_CapBla	Gaylussacia baccata	Ericaceae	CapBla	Cape Blanco	Temperate rain forest	TRF	Deciduous	Shrub	Understorey-subcanopy	270.5	169.128
Gaylussacia baccata_PorOrf	Gaylussacia baccata	Ericaceae	PorOrf	Port Orford	Temperate rain forest	TRF	Deciduous	Shrub	Understorey-subcanopy	317.8	202.391
Gironniera celtidifolia_Sea	Gironniera celtidifolia	Cannabaceae	Sea	Seaqaqa	Tropical forest	TF	Evergreen	Tree	Understorey-subcanopy	442.6	290.155
Gonzalagunia hirsuta_Gua	Gonzalagunia hirsuta	Rubiaceae	Gua	Guajataca	Tropical seasonal forest (moist)	TSF_M	Evergreen	Shrub	Understorey-subcanopy	509.4	337.131
Heritiera ornithocephala_Sea	Heritiera ornithocephala	Malvaceae	Sea	Seaqaqa	Tropical forest	TF	Evergreen	Tree	Understorey-subcanopy	279	175.105
Holodiscus discolor_Ban	Holodiscus discolor	Rosaceae	Ban	Bandon	Temperate rain forest	TRF	Deciduous	Shrub	Understorey-subcanopy	333	213.1
Holodiscus discolor_JasRid	Holodiscus discolor	Rosaceae	JasRid	Jasper Ridge	Temperate grassland/chapparal	TG-C	Deciduous	Shrub	Understorey-subcanopy	383.8	248.805
Holodiscus discolor_PorOrf	Holodiscus discolor	Rosaceae	PorOrf	Port Orford	Temperate rain forest	TRF	Deciduous	Shrub	Understorey-subcanopy	424.1	277.145
Ilex opaca_BatCre	Ilex opaca	Aquifoliaceae	BatCre	Battle Creek	Temperate deciduous forest	TDF	Evergreen	Tree	Understorey-subcanopy	372	240.5
Ilex opaca_Serc	Ilex opaca	Aquifoliaceae	Serc	SERC, Maryland	Temperate deciduous forest	TDF	Evergreen	Tree	Understorey-subcanopy	336.9	215.823
Ilex verticillata_BatCre	Ilex verticillata	Aquifoliaceae	BatCre	Battle Creek	Temperate deciduous forest	TDF	Deciduous	Shrub	Understorey-subcanopy	413.2	269.5
Ixora maxima_Nat	Ixora maxima	Rubiaceae	Nat	Natua	Tropical forest	TF	Evergreen	Shrub	Understorey-subcanopy	384.1	249.015
Ixora pelagica_Nat	Ixora pelagica	Rubiaceae	Nat	Natua	Tropical forest	TF	Evergreen	Shrub	Understorey-subcanopy	361.8	233.333
Kalmia latifolia_BatCre	Kalmia latifolia	Ericaceae	BatCre	Battle Creek	Temperate deciduous forest	TDF	Evergreen	Tree	Understorey-subcanopy	199	118.8
Kalmia latifolia_Serc	Kalmia latifolia	Ericaceae	Serc	SERC, Maryland	Temperate deciduous forest	TDF	Evergreen	Tree	Understorey-subcanopy	380.7	246.624
Lindera benzoin_Serc	Lindera benzoin	Lauraceae	Serc	SERC, Maryland	Temperate deciduous forest	TDF	Deciduous	Shrub	Understorey-subcanopy	141.3	78.27
Linnaea borealis_BirCre	Linnaea borealis	Caprifoliaceae	BirCre	Bird Creek	Boreal forest	BF	Evergreen	Shrub	Understorey-subcanopy	294.3	185.9
Linnaea borealis_CapCoo	Linnaea borealis	Caprifoliaceae	CapCoo	Captain Cook SRA	Boreal forest	BF	Evergreen	Shrub	Understorey-subcanopy	332.6	212.799
Linnaea borealis_EklLak	Linnaea borealis	Caprifoliaceae	EklLak	Eklutna Lake	Boreal forest	BF	Evergreen	Shrub	Understorey-subcanopy	192.1	113.994
Lonicera hispidula_Ban	Lonicera hispidula	Caprifoliaceae	Ban	Bandon	Temperate rain forest	TRF	Deciduous	Shrub	Understorey-subcanopy	180.5	105.8
Lonicera hispidula_NewBri	Lonicera hispidula	Caprifoliaceae	NewBri	New Brighton	Temperate grassland/chapparal	TG-C	Deciduous	Shrub	Understorey-subcanopy	247.2	152.743
Lonicera hispidula_PorOrf	Lonicera hispidula	Caprifoliaceae	PorOrf	Port Orford	Temperate rain forest	TRF	Evergreen	Shrub	Understorey-subcanopy	245.3	151.406
Lonicera involucrata_PorOrf	Lonicera involucrata	Caprifoliaceae	PorOrf	Port Orford	Temperate rain forest	TRF	Deciduous	Shrub	Understorey-subcanopy	247.3	152.813
Lonicera tatarica_BigPoc	Lonicera tatarica	Caprifoliaceae	BigPoc	Big Pocono	Temperate deciduous forest	TDF	Deciduous	Shrub	Understorey-subcanopy	428.6	280.3
Maesa tabacifolia_Nat	Maesa tabacifolia	Primulaceae	Nat	Natua	Tropical forest	TF	Evergreen	Shrub	Understorey-subcanopy	420.1	274.332
Malpighia coccigera_Gua	Malpighia coccigera	Malpighiaceae	Gua	Guajataca	Tropical seasonal forest (moist)	TSF_M	Evergreen	Shrub	Understorey-subcanopy	394	255.977
Menziesia ferruginea_BirCre	Menziesia ferruginea	Ericaceae	BirCre	Bird Creek	Boreal forest	BF	Deciduous	Shrub	Understorey-subcanopy	289.7	182.6
Menziesia ferruginea_CapCoo	Menziesia ferruginea	Ericaceae	CapCoo	Captain Cook SRA	Boreal forest	BF	Deciduous	Shrub	Understorey-subcanopy	356.6	229.677
Miconia prasina_Gua	Miconia prasina	Melastomataceae	Gua	Guajataca	Tropical seasonal forest (moist)	TSF_M	Evergreen	Shrub	Understorey-subcanopy	349.4	224.613
Micromelum minutum_Sea	Micromelum minutum	Rutaceae	Sea	Seaqaqa	Tropical forest	TF	Evergreen	Shrub	Understorey-subcanopy	405.7	264.205
Mimulus aurantiacus_NewBri	Mimulus aurantiacus	Phrymaceae	NewBri	New Brighton	Temperate grassland/chapparal	TG-C	Evergreen	Shrub	Understorey-subcanopy	429.5	280.942
Myrica californica_Ban	Myrica californica	Myricaceae	Ban	Bandon	Temperate rain forest	TRF	Evergreen	Tree	Understorey-subcanopy	371.4	240.1
Myrica californica_CapBla	Myrica californica	Myricaceae	CapBla	Cape Blanco	Temperate rain forest	TRF	Deciduous	Tree	Understorey-subcanopy	289.5	182.489
Myrica californica_NewBri	Myrica californica	Myricaceae	NewBri	New Brighton	Temperate grassland/chapparal	TG-C	Evergreen	Tree	Understorey-subcanopy	386.9	250.985
Myristica castaneifolia_Nat	Myristica castaneifolia	Myristicaceae	Nat	Natua	Tropical forest	TF	Evergreen	Tree	Understorey-subcanopy	206.4	124.051
Myristica castaneifolia_Sea	Myristica castaneifolia	Myristicaceae	Sea	Seaqaqa	Tropical forest	TF	Evergreen	Tree	Understorey-subcanopy	315	200.422
Myristica chartacea_Nat	Myristica chartacea	Myristicaceae	Nat	Natua	Tropical forest	TF	Evergreen	Tree	Understorey-subcanopy	239.2	147.117
Neea buxifolia_Gua	Neea buxifolia	Nyctaginaceae	Gua	Guajataca	Tropical seasonal forest (moist)	TSF_M	Evergreen	Shrub	Understorey-subcanopy	75.8	32.2082
Neuburgia corynocarpa_Sea	Neuburgia corynocarpa	Loganiaceae	Sea	Seaqaqa	Tropical forest	TF	Evergreen	Tree	Understorey-subcanopy	338.4	216.878
Nothobaccaurea pulvinata_Nat	Nothobaccaurea pulvinata	Phyllanthaceae	Nat	Natua	Tropical forest	TF	Evergreen	Tree	Understorey-subcanopy	297.6	188.186
Nyssa sylvatica_Serc	Nyssa sylvatica	Cornaceae	Serc	SERC, Maryland	Temperate deciduous forest	TDF	Deciduous	Tree	Understorey-subcanopy	133.3	72.6442
Oemleria cerasiformis_NewBri	Oemleria cerasiformis	Rosaceae	NewBri	New Brighton	Temperate grassland/chapparal	TG-C	Deciduous	Shrub	Understorey-subcanopy	470.4	309.705
Oemleria cerasiformis_PorOrf	Oemleria cerasiformis	Rosaceae	PorOrf	Port Orford	Temperate rain forest	TRF	Deciduous	Shrub	Understorey-subcanopy	178.7	104.571
Oplopanax horridus_BirCre	Oplopanax horridus	Araliaceae	BirCre	Bird Creek	Boreal forest	BF	Deciduous	Shrub	Understorey-subcanopy	431.5	282.3
Oplopanax horridus_CapCoo	Oplopanax horridus	Araliaceae	CapCoo	Captain Cook SRA	Boreal forest	BF	Deciduous	Shrub	Understorey-subcanopy	350.7	225.527
Ostrya virginiana_BatCre	Ostrya virginiana	Betulaceae	BatCre	Battle Creek	Temperate deciduous forest	TDF	Deciduous	Tree	Understorey-subcanopy	184.4	108.6
Parinari insularum_Nat	Parinari insularum	Chrysobalanaceae	Nat	Natua	Tropical forest	TF	Evergreen	Tree	Understorey-subcanopy	479.7	316.245
Parinari insularum_Sea	Parinari insularum	Chrysobalanaceae	Sea	Seaqaqa	Tropical forest	TF	Evergreen	Tree	Understorey-subcanopy	368.9	238.326
Polyscias multijuga_Sea	Polyscias multijuga	Araliaceae	Sea	Seaqaqa	Tropical forest	TF	Evergreen	Shrub	Understorey-subcanopy	224.7	136.92
Prunus serotina_BatCre	Prunus serotina	Rosaceae	BatCre	Battle Creek	Temperate deciduous forest	TDF	Deciduous	Tree	Understorey-subcanopy	179.1	104.9
Prunus serotina_BigPoc	Prunus serotina	Rosaceae	BigPoc	Big Pocono	Temperate deciduous forest	TDF	Deciduous	Tree	Understorey-subcanopy	343.5	220.5
Prunus serotina_Gou	Prunus serotina	Rosaceae	Gou	Gouldsboro	Temperate deciduous forest	TDF	Deciduous	Tree	Understorey-subcanopy	360.8	232.63
Prunus serotina_Serc	Prunus serotina	Rosaceae	Serc	SERC, Maryland	Temperate deciduous forest	TDF	Deciduous	Tree	Understorey-subcanopy	227.5	138.889
Psychotria nervosa_Gua	Psychotria nervosa	Rubiaceae	Gua	Guajataca	Tropical seasonal forest (moist)	TSF_M	Evergreen	Shrub	Understorey-subcanopy	669.4	449.648
Quercus agrifolia_NewBri	Quercus agrifolia	Fagaceae	NewBri	New Brighton	Temperate grassland/chapparal	TG-C	Evergreen	Tree	Understorey-subcanopy	290.3	183.052
Quercus alba_BigPoc	Quercus alba	Fagaceae	BigPoc	Big Pocono	Temperate deciduous forest	TDF	Deciduous	Tree	Understorey-subcanopy	402.8	262.2
Quercus falcata_BatCre	Quercus falcata	Fagaceae	BatCre	Battle Creek	Temperate deciduous forest	TDF	Deciduous	Tree	Understorey-subcanopy	499.1	329.9
Quercus palustris_Serc	Quercus palustris	Fagaceae	Serc	SERC, Maryland	Temperate deciduous forest	TDF	Deciduous	Tree	Understorey-subcanopy	377.4	244.304
Quercus rubra_BigPoc	Quercus rubra	Fagaceae	BigPoc	Big Pocono	Temperate deciduous forest	TDF	Deciduous	Tree	Understorey-subcanopy	399.2	259.6
Randia aculeata_Gua	Randia aculeata	Rubiaceae	Gua	Guajataca	Tropical seasonal forest (moist)	TSF_M	Deciduous	Shrub	Understorey-subcanopy	303.1	192.053
Rhamnus crocea_JasRid	Rhamnus crocea	Rhamnaceae	JasRid	Jasper Ridge	Temperate grassland/chapparal	TG-C	Evergreen	Shrub	Understorey-subcanopy	281.3	176.723
Rhododendron macrophyllum_Ban	Rhododendron macrophyllum	Ericaceae	Ban	Bandon	Temperate rain forest	TRF	Evergreen	Tree	Understorey-subcanopy	200.5	119.9
Rhododendron macrophyllum_CapBla	Rhododendron macrophyllum	Ericaceae	CapBla	Cape Blanco	Temperate rain forest	TRF	Evergreen	Tree	Understorey-subcanopy	212.4	128.27
Rhododendron maximum_BigPoc	Rhododendron maximum	Ericaceae	BigPoc	Big Pocono	Temperate deciduous forest	TDF	Evergreen	Tree	Understorey-subcanopy	359.5	231.7
Ribes hudsonianum_BirCre	Ribes hudsonianum	Grossulariaceae	BirCre	Bird Creek	Boreal forest	BF	Deciduous	Shrub	Understorey-subcanopy	230.5	141
Ribes hudsonianum_CapCoo	Ribes hudsonianum	Grossulariaceae	CapCoo	Captain Cook SRA	Boreal forest	BF	Deciduous	Shrub	Understorey-subcanopy	458.3	301.195
Ribes hudsonianum_EklLak	Ribes hudsonianum	Grossulariaceae	EklLak	Eklutna Lake	Boreal forest	BF	Deciduous	Shrub	Understorey-subcanopy	471.6	310.549
Ribes laxiflorum_BirCre	Ribes laxiflorum	Grossulariaceae	BirCre	Bird Creek	Boreal forest	BF	Deciduous	Shrub	Understorey-subcanopy	398.3	259
Ribes laxiflorum_CapCoo	Ribes laxiflorum	Grossulariaceae	CapCoo	Captain Cook SRA	Boreal forest	BF	Deciduous	Shrub	Understorey-subcanopy	239.9	147.609
Ribes sanguineum_Ban	Ribes sanguineum	Grossulariaceae	Ban	Bandon	Temperate rain forest	TRF	Deciduous	Shrub	Understorey-subcanopy	315.6	200.8
Ribes sanguineum_CapBla	Ribes sanguineum	Grossulariaceae	CapBla	Cape Blanco	Temperate rain forest	TRF	Deciduous	Shrub	Understorey-subcanopy	422.4	275.949
Ribes sanguineum_NewBri	Ribes sanguineum	Grossulariaceae	NewBri	New Brighton	Temperate grassland/chapparal	TG-C	Deciduous	Shrub	Understorey-subcanopy	216.7	131.294
Ribes sanguineum_PorOrf	Ribes sanguineum	Grossulariaceae	PorOrf	Port Orford	Temperate rain forest	TRF	Deciduous	Shrub	Understorey-subcanopy	435.9	285.443
Ribes triste_BirCre	Ribes triste	Grossulariaceae	BirCre	Bird Creek	Boreal forest	BF	Deciduous	Shrub	Understorey-subcanopy	355.3	228.8
Ribes triste_CapCoo	Ribes triste	Grossulariaceae	CapCoo	Captain Cook SRA	Boreal forest	BF	Deciduous	Shrub	Understorey-subcanopy	329.9	210.9
Ribes triste_EklLak	Ribes triste	Grossulariaceae	EklLak	Eklutna Lake	Boreal forest	BF	Deciduous	Shrub	Understorey-subcanopy	219.5	133.263
Rondeletia inermis_Gua	Rondeletia inermis	Rubiaceae	Gua	Guajataca	Tropical seasonal forest (moist)	TSF_M	Evergreen	Shrub	Understorey-subcanopy	334.2	213.924
Rosa acicularis_BirCre	Rosa acicularis	Rosaceae	BirCre	Bird Creek	Boreal forest	BF	Deciduous	Shrub	Understorey-subcanopy	410.3	267.4
Rosa acicularis_CapCoo	Rosa acicularis	Rosaceae	CapCoo	Captain Cook SRA	Boreal forest	BF	Deciduous	Shrub	Understorey-subcanopy	530	351.617
Rosa acicularis_EklLak	Rosa acicularis	Rosaceae	EklLak	Eklutna Lake	Boreal forest	BF	Deciduous	Shrub	Understorey-subcanopy	329.6	210.689
Rosa californica_NewBri	Rosa californica	Rosaceae	NewBri	New Brighton	Temperate grassland/chapparal	TG-C	Deciduous	Shrub	Understorey-subcanopy	460.9	303.024
Rosa gymnocarpa_NewBri	Rosa gymnocarpa	Rosaceae	NewBri	New Brighton	Temperate grassland/chapparal	TG-C	Deciduous	Shrub	Understorey-subcanopy	327.3	209.072
Rosa nutkana_PorOrf	Rosa nutkana	Rosaceae	PorOrf	Port Orford	Temperate rain forest	TRF	Deciduous	Shrub	Understorey-subcanopy	353.3	227.356
Rubus idaeus_BirCre	Rubus idaeus	Rosaceae	BirCre	Bird Creek	Boreal forest	BF	Deciduous	Shrub	Understorey-subcanopy	691.2	465
Rubus idaeus_CapCoo	Rubus idaeus	Rosaceae	CapCoo	Captain Cook SRA	Boreal forest	BF	Deciduous	Shrub	Understorey-subcanopy	461.8	303.657
Rubus idaeus_EklLak	Rubus idaeus	Rosaceae	EklLak	Eklutna Lake	Boreal forest	BF	Deciduous	Shrub	Understorey-subcanopy	507.1	335.513
Rubus parviflorus_Ban	Rubus parviflorus	Rosaceae	Ban	Bandon	Temperate rain forest	TRF	Deciduous	Shrub	Understorey-subcanopy	467.2	307.5
Rubus parviflorus_PorOrf	Rubus parviflorus	Rosaceae	PorOrf	Port Orford	Temperate rain forest	TRF	Deciduous	Shrub	Understorey-subcanopy	396.6	257.806
Rubus praecox_PorOrf	Rubus praecox	Rosaceae	PorOrf	Port Orford	Temperate rain forest	TRF	Deciduous	Shrub	Understorey-subcanopy	600.8	401.406
Rubus spectabilis_Ban	Rubus spectabilis	Rosaceae	Ban	Bandon	Temperate rain forest	TRF	Deciduous	Shrub	Understorey-subcanopy	563	374.8
Rubus spectabilis_CapBla	Rubus spectabilis	Rosaceae	CapBla	Cape Blanco	Temperate rain forest	TRF	Deciduous	Shrub	Understorey-subcanopy	427.9	279.817
Rubus spectabilis_PorOrf	Rubus spectabilis	Rosaceae	PorOrf	Port Orford	Temperate rain forest	TRF	Deciduous	Shrub	Understorey-subcanopy	368.4	237.975
Rubus ursinus_CapBla	Rubus ursinus	Rosaceae	CapBla	Cape Blanco	Temperate rain forest	TRF	Deciduous	Shrub	Understorey-subcanopy	369.6	238.819
Rubus ursinus_PorOrf	Rubus ursinus	Rosaceae	PorOrf	Port Orford	Temperate rain forest	TRF	Deciduous	Shrub	Understorey-subcanopy	413.3	269.55
Salix lasiandra_HalMoo	Salix lasiandra	Salicaceae	HalMoo	Half Moon Bay	Temperate grassland/chapparal	TG-C	Deciduous	Tree	Understorey-subcanopy	452	296.765
Salix lasiandra_JasRid	Salix lasiandra	Salicaceae	JasRid	Jasper Ridge	Temperate grassland/chapparal	TG-C	Deciduous	Tree	Understorey-subcanopy	498.4	329.395
Salix lasiandra_NewBri	Salix lasiandra	Salicaceae	NewBri	New Brighton	Temperate grassland/chapparal	TG-C	Deciduous	Tree	Understorey-subcanopy	294	185.654
Salix lasiolepis_JasRid	Salix lasiolepis	Salicaceae	JasRid	Jasper Ridge	Temperate grassland/chapparal	TG-C	Deciduous	Tree	Understorey-subcanopy	597.7	399.226
Salix lasiolepis_NewBri	Salix lasiolepis	Salicaceae	NewBri	New Brighton	Temperate grassland/chapparal	TG-C	Deciduous	Tree	Understorey-subcanopy	558.9	371.941
Salix sitchensis_Ban	Salix sitchensis	Salicaceae	Ban	Bandon	Temperate rain forest	TRF	Deciduous	Tree	Understorey-subcanopy	583.3	389.1
Salix sitchensis_CapBla	Salix sitchensis	Salicaceae	CapBla	Cape Blanco	Temperate rain forest	TRF	Deciduous	Tree	Understorey-subcanopy	487.8	321.941
Salix sp1_CapCoo	Salix sp1	Salicaceae	CapCoo	Captain Cook SRA	Boreal forest	BF	Deciduous	Shrub	Understorey-subcanopy	625.6	418.847
Salix sp2_CapCoo	Salix sp2	Salicaceae	CapCoo	Captain Cook SRA	Boreal forest	BF	Deciduous	Shrub	Understorey-subcanopy	645.5	432.841
Salix sp3_CapCoo	Salix sp3	Salicaceae	CapCoo	Captain Cook SRA	Boreal forest	BF	Deciduous	Tree	Understorey-subcanopy	578.2	385.513
Sambucus nigra_NewBri	Sambucus nigra	Adoxaceae	NewBri	New Brighton	Temperate grassland/chapparal	TG-C	Deciduous	Tree	Understorey-subcanopy	229.3	140.155
Sambucus racemosa_Ban	Sambucus racemosa	Adoxaceae	Ban	Bandon	Temperate rain forest	TRF	Deciduous	Tree	Understorey-subcanopy	379.2	245.6
Sambucus racemosa_BirCre	Sambucus racemosa	Adoxaceae	BirCre	Bird Creek	Boreal forest	BF	Deciduous	Tree	Understorey-subcanopy	392.9	255.2
Sambucus racemosa_CapCoo	Sambucus racemosa	Adoxaceae	CapCoo	Captain Cook SRA	Boreal forest	BF	Deciduous	Tree	Understorey-subcanopy	610.2	408.017
Sambucus racemosa_Gou	Sambucus racemosa	Adoxaceae	Gou	Gouldsboro	Temperate deciduous forest	TDF	Deciduous	Tree	Understorey-subcanopy	435.1	284.88
Sambucus racemosa_HalMoo	Sambucus racemosa	Adoxaceae	HalMoo	Half Moon Bay	Temperate grassland/chapparal	TG-C	Deciduous	Tree	Understorey-subcanopy	360.2	232.208
Sassafras albidum_BatCre	Sassafras albidum	Lauraceae	BatCre	Battle Creek	Temperate deciduous forest	TDF	Deciduous	Tree	Understorey-subcanopy	346.4	222.5
Sassafras albidum_BigPoc	Sassafras albidum	Lauraceae	BigPoc	Big Pocono	Temperate deciduous forest	TDF	Deciduous	Tree	Understorey-subcanopy	504.5	333.7
Sassafras albidum_Serc	Sassafras albidum	Lauraceae	Serc	SERC, Maryland	Temperate deciduous forest	TDF	Deciduous	Tree	Understorey-subcanopy	326.1	208.228
Schefflera morototoni_Gua	Schefflera morototoni	Araliaceae	Gua	Guajataca	Tropical seasonal forest (moist)	TSF_M	Evergreen	Tree	Understorey-subcanopy	344.5	221.167
Shepherdia canadensis_BirCre	Shepherdia canadensis	Elaeagnaceae	BirCre	Bird Creek	Boreal forest	BF	Deciduous	Shrub	Understorey-subcanopy	469	308.7
Shepherdia canadensis_EklLak	Shepherdia canadensis	Elaeagnaceae	EklLak	Eklutna Lake	Boreal forest	BF	Deciduous	Shrub	Understorey-subcanopy	443.1	290.506
Sorbus scopulina_BirCre	Sorbus scopulina	Rosaceae	BirCre	Bird Creek	Boreal forest	BF	Deciduous	Tree	Understorey-subcanopy	513.7	340.2
Sorbus scopulina_CapCoo	Sorbus scopulina	Rosaceae	CapCoo	Captain Cook SRA	Boreal forest	BF	Deciduous	Tree	Understorey-subcanopy	426.2	278.622
Sorbus_Gou	Sorbus	Rosaceae	Gou	Gouldsboro	Temperate deciduous forest	TDF	Deciduous	Tree	Understorey-subcanopy	428.7	280.38
Spiraea alba_Gou	Spiraea alba	Rosaceae	Gou	Gouldsboro	Temperate deciduous forest	TDF	Deciduous	Shrub	Understorey-subcanopy	493.8	326.16
Spiraea betulifolia_CapCoo	Spiraea betulifolia	Rosaceae	CapCoo	Captain Cook SRA	Boreal forest	BF	Deciduous	Shrub	Understorey-subcanopy	418.9	273.488
Spiraea douglasii_Ban	Spiraea douglasii	Rosaceae	Ban	Bandon	Temperate rain forest	TRF	Deciduous	Shrub	Understorey-subcanopy	534.9	355.1
Stenostomum resinosum_Gua	Stenostomum resinosum	Rubiaceae	Gua	Guajataca	Tropical seasonal forest (moist)	TSF_M	Evergreen	Tree	Understorey-subcanopy	288.7	181.927
Symphoricarpos albus_JasRid	Symphoricarpos albus	Caprifoliaceae	JasRid	Jasper Ridge	Temperate grassland/chapparal	TG-C	Deciduous	Shrub	Understorey-subcanopy	187.7	110.9
Tabernaemontana pandacaqui_Sea	Tabernaemontana pandacaqui	Apocynaceae	Sea	Seaqaqa	Tropical forest	TF	Evergreen	Tree	Understorey-subcanopy	425.1	277.848
Tabernaemontana thurstonii_Sea	Tabernaemontana thurstonii	Apocynaceae	Sea	Seaqaqa	Tropical forest	TF	Evergreen	Tree	Understorey-subcanopy	496.3	327.918
Thouinia striata_Gua	Thouinia striata	Sapindaceae	Gua	Guajataca	Tropical seasonal forest (moist)	TSF_M	Evergreen	Tree	Understorey-subcanopy	394.8	256.54
Tilia americana_BigPoc	Tilia americana	Malvaceae	BigPoc	Big Pocono	Temperate deciduous forest	TDF	Deciduous	Shrub	Understorey-subcanopy	156	88.6
Ulmus americana_BatCre	Ulmus americana	Ulmaceae	BatCre	Battle Creek	Temperate deciduous forest	TDF	Deciduous	Tree	Understorey-subcanopy	322.5	205.7
Ulmus americana_BigPoc	Ulmus americana	Ulmaceae	BigPoc	Big Pocono	Temperate deciduous forest	TDF	Deciduous	Tree	Understorey-subcanopy	388.2	251.9
Ulmus americana_Serc	Ulmus americana	Ulmaceae	Serc	SERC, Maryland	Temperate deciduous forest	TDF	Deciduous	Tree	Understorey-subcanopy	373	241.21
Umbellularia californica_JasRid	Umbellularia californica	Lauraceae	JasRid	Jasper Ridge	Temperate grassland/chapparal	TG-C	Evergreen	Tree	Understorey-subcanopy	123	65.4008
Umbellularia californica_NewBri	Umbellularia californica	Lauraceae	NewBri	New Brighton	Temperate grassland/chapparal	TG-C	Evergreen	Tree	Understorey-subcanopy	111.8	57.5246
Umbellularia californica_PorOrf	Umbellularia californica	Lauraceae	PorOrf	Port Orford	Temperate rain forest	TRF	Evergreen	Tree	Understorey-subcanopy	392.1	254.641
Vaccinium angustifolium_Gou	Vaccinium angustifolium	Ericaceae	Gou	Gouldsboro	Temperate deciduous forest	TDF	Deciduous	Shrub	Understorey-subcanopy	391.2	254.008
Vaccinium corymbosum_BigPoc	Vaccinium corymbosum	Ericaceae	BigPoc	Big Pocono	Temperate deciduous forest	TDF	Deciduous	Shrub	Understorey-subcanopy	156.8	89.2
Vaccinium corymbosum_Gou	Vaccinium corymbosum	Ericaceae	Gou	Gouldsboro	Temperate deciduous forest	TDF	Deciduous	Shrub	Understorey-subcanopy	387.6	251.477
Vaccinium ovatum_CapBla	Vaccinium ovatum	Ericaceae	CapBla	Cape Blanco	Temperate rain forest	TRF	Deciduous	Shrub	Understorey-subcanopy	421	274.965
Vaccinium ovatum_PorOrf	Vaccinium ovatum	Ericaceae	PorOrf	Port Orford	Temperate rain forest	TRF	Evergreen	Shrub	Understorey-subcanopy	288.2	181.575
Vaccinium vitis-idaea_CapCoo	Vaccinium vitis-idaea	Ericaceae	CapCoo	Captain Cook SRA	Boreal forest	BF	Evergreen	Shrub	Understorey-subcanopy	333.7	213.572
Vaccinium vitis-idaea_EklLak	Vaccinium vitis-idaea	Ericaceae	EklLak	Eklutna Lake	Boreal forest	BF	Evergreen	Shrub	Understorey-subcanopy	256.9	159.564
Vavaea amicorum_Nat	Vavaea amicorum	Meliaceae	Nat	Natua	Tropical forest	TF	Evergreen	Tree	Understorey-subcanopy	346.4	222.504
Vavaea amicorum_Sea	Vavaea amicorum	Meliaceae	Sea	Seaqaqa	Tropical forest	TF	Evergreen	Tree	Understorey-subcanopy	268.8	167.932
Viburnum acerifolium_BigPoc	Viburnum acerifolium	Adoxaceae	BigPoc	Big Pocono	Temperate deciduous forest	TDF	Deciduous	Shrub	Understorey-subcanopy	387.9	251.7
Viburnum edule_BirCre	Viburnum edule	Adoxaceae	BirCre	Bird Creek	Boreal forest	BF	Deciduous	Shrub	Understorey-subcanopy	445.2	292
Viburnum edule_CapCoo	Viburnum edule	Adoxaceae	CapCoo	Captain Cook SRA	Boreal forest	BF	Deciduous	Shrub	Understorey-subcanopy	507.7	335.935
Viburnum edule_EklLak	Viburnum edule	Adoxaceae	EklLak	Eklutna Lake	Boreal forest	BF	Deciduous	Shrub	Understorey-subcanopy	334.9	214.416
Viburnum recognitum_BatCre	Viburnum recognitum	Adoxaceae	BatCre	Battle Creek	Temperate deciduous forest	TDF	Deciduous	Shrub	Understorey-subcanopy	386.6	250.8
Viburnum recognitum_Gou	Viburnum recognitum	Adoxaceae	Gou	Gouldsboro	Temperate deciduous forest	TDF	Deciduous	Shrub	Understorey-subcanopy	512.5	339.311
